# Supplementary material for: Development of light-responsive protein binding in the monobody non-immunoglobulin scaffold
Source: PubMed Central journal article supplement (PMC7427095; doi:10.1038/s41467-020-17837-7), 2020-08-13
Supplement: 41467_2020_17837_MOESM1_ESM.pdf [file 41467_2020_17837_MOESM1_ESM.pdf]

1  
2  
3  
4  
5  
6  
7  
8  
9  
10  
11  
12  
13  
14  
15  
16  
17  
18  
19  
20  
21  
22  
23  
24  
25  
26  
27  
28  
29  
30  
31  
32  
33  
34

**Supplementary information to:**

**Development of light-responsive protein binding in the monobody non-immunoglobulin scaffold**

César Carrasco-López<sup>1,#</sup>, Evan M. Zhao<sup>1,#</sup>, Agnieszka A. Gil<sup>2,#</sup>, Nathan Alam<sup>1</sup>, Jared E. Toettcher<sup>2,\*</sup> and José. L. Avalos<sup>1,3,\*</sup>

<sup>1</sup> Department of Chemical and Biological Engineering  
Princeton University, Princeton NJ 08544

<sup>2</sup> Department of Molecular Biology  
Princeton University, Princeton NJ 08544

<sup>3</sup> Andlinger Center for Energy and the Environment  
Princeton University, Princeton NJ 08544

# These authors contributed to this work equally

\* Co-corresponding Authors  
toettcher@princeton.edu; javalos@princeton.edu

35 **Supplementary Information**

36

37 **Supplementary Note 1**

38 The AsLOV2 sequence is highlighted in blue.

39 HA4-AsLOV2 (SS58 insertion):  $\alpha$ SH2-OptoMB

40 GSSVSSVPTKLEVVAATPTSLLISWDAPMSSSSSVYYYRITYGETGGNSPVQEFTVPYSGL  
41 ERIEKNFVITDPRLPDNPIIFASDSFLQLTEYSREEILGRNCRFLQGPETDRATVRKIRDAID  
42 NQTEVTVQLINYTKSGKKFWNLFHLQPMRDQKGDVQYFIGVQLDGTEHVRDAAEREG  
43 VMLIKKTAENIDEAAGSSTATISGLSPGVDYTITVYAWGEDSAGYMFMYSPISINYRTC\*

44

45 HA4-AsLOV2 (MS29 insertion with residues removed from Loop AB):

46 GSSVSSVPTKLEVVAATPTSLLISWDAPMGLERIEKNFVITDPRLPDNPIIFASDSFLQLTE  
47 YSREEILGRNCRFLQGPETDRATVRKIRDAIDNQTEVTVQLINYTKSGKKFWNLFHLQ  
48 MRDQKGDVQYFIGVQLDGTEHVRDAAEREGVMLIKKTAENIDEAAGSVYYYRITYGET  
49 GGNSPVQEFTVPYSSSTATISGLSPGVDYTITVYAWGEDSAGYMFMYSPISINYRTC\*

50

51 HA4-AsLOV2 (MS29 insertion):

52 GSSVSSVPTKLEVVAATPTSLLISWDAPMGLERIEKNFVITDPRLPDNPIIFASDSFLQLTE  
53 YSREEILGRNCRFLQGPETDRATVRKIRDAIDNQTEVTVQLINYTKSGKKFWNLFHLQ  
54 MRDQKGDVQYFIGVQLDGTEHVRDAAEREGVMLIKKTAENIDEAAGSSSSVYYYRITY  
55 GETGGNSPVQEFTVPYSSSTATISGLSPGVDYTITVYAWGEDSAGYMFMYSPISINYRTC  
56 \*

57

58

59 HA4-AsLOV2 (GN46 insertion with residues removed from Loop CD):

60 GSSVSSVPTKLEVVAATPTSLLISWDAPMSSSSSVYYYRITYGETGGLERIEKNFVITDPRL  
61 PDNPIIFASDSFLQLTEYSREEILGRNCRFLQGPETDRATVRKIRDAIDNQTEVTVQLINYT  
62 KSGKKFWNLFHLQPMRDQKGDVQYFIGVQLDGTEHVRDAAEREGVMLIKKTAENIDE  
63 AAGNSPVQEFTVPYSSSTATISGLSPGVDYTITVYAWGEDSAGYMFMYSPISINYRTC\*

64

65 HA4-AsLOV2 (TN45 insertion with residues removed from Loop CD):

66 GSSVSSVPTKLEVVAATPTSLLISWDAPMSSSSSVYYYRITYGETGLERIEKNFVITDPRLP  
67 DNPIIFASDSFLQLTEYSREEILGRNCRFLQGPETDRATVRKIRDAIDNQTEVTVQLINYTK  
68 SGKKFWNLFHLQPMRDQKGDVQYFIGVQLDGTEHVRDAAEREGVMLIKKTAENIDEA  
69 AGNSPVQEFTVPYSSSTATISGLSPGVDYTITVYAWGEDSAGYMFMYSPISINYRTC\*

70

71 HA4-AsLOV2 (SP68 insertion with residues removed from Loop EF):

72 GSSVSSVPTKLEVVAATPTSLLISWDAPMSSSSSVYYYRITYGETGGNSPVQEFTVPYSSST  
73 ATISGGLERIEKNFVITDPRLPDNPIIFASDSFLQLTEYSREEILGRNCRFLQGPETDRATV  
74 RKIRDAIDNQTEVTVQLINYTKSGKKFWNLFHLQPMRDQKGDVQYFIGVQLDGTEHVR  
75 DAAEREGVMLIKKTAENIDEAAGPVDYTITVYAWGEDSAGYMFMYSPISINYRTC\*

76

77 HA4-AsLOV2 (PT18 insertion with residues removed from Loop AB):

78 GSSVSSVPTKLEVVAAPGLERIEKNFVITDPRLPDNPIIFASDSFLQLTEYSREEILGRNCRF  
LQGPETDRATVRKIRDAIDNQTEVTVQLINYTKSGKKFWNLFHLQPMRDQKGDVQYFIG

79 VQLDGTEHVRDAAEREGVMLIKKTAENIDEAA GTSELLISWDAPMSSSSVYYYRITYGET  
80 GGNSPVQEFTVPYSSSTATISGLSPGVDYTITVYAWGEDSAGYMFMYSPISINYRTC\*

81  
82

83 AsLOV2 domain:

84 GLERIEKNFVITDPRLPDNPIIFASDSFLQLTEYSREEILGRNCRFLQGPETDRATVRKIRD  
85 AIDNQTEVTVQLINYTKSGKKFWNLFHLQPMRDQKGDVQYFIGVQLDGTEHVRDAAER  
86 EGVMLIKKTAENIDEAAG

87

88 Monobody HA4:

89 GSSVSSVPTKLEVVAATPTSLLISWDAPMSSSSVYYYRITYGETGGNSPVQEFTVPYSSST  
90 ATISGLSPGVDYTITVYAWGEDSAGYMFMYSPISINYRTC\*

91

92 His<sub>6</sub>-YFP-SH2:

93 HHHHHHSSGENLYFQGHMASKVSKGEELFTGVVPILVELDGDVNGHKFSVSGEGEGDA  
94 TYGKLTCLKFICTTGKLPWPPTLVTTFGYGLQCFARYPDHMKQHDFFKSAMPEGYVQE  
95 RTIFFKDDGNYKTRAEVKFEGDTLVNRIELKGIDFKEDGNILGHKLEYNYNSHNVYIMA  
96 DKQKNGIKVNFKIRHNIEDGSVQLADHYQQNTPIGDGPVLLPDNHYLSTQSALS KDPNE  
97 KRDMVLLLEFVTAAGITLGMDELKYSLEKHSWYHGPVSRNAEYLLSSGINGSFLVRES  
98 ESSPGQRSISLRYEGRVYHYRINTASDGKLYVSSSESRFNTLAELVHHHSTVADGLITTLH  
99 YPAPKRNKPTVYGVSPNY\*

100

101 HA4-AsLOV2 (SS30 insertion):

102 GSSVSSVPTKLEVVAATPTSLLISWDAPMS GLERIEKNFVITDPRLPDNPIIFASDSFLQLT  
103 EYSREEILGRNCRFLQGPETDRATVRKIRDAIDNQTEVTVQLINYTKSGKKFWNLFHLQ  
104 MRDQKGDVQYFIGVQLDGTEHVRDAAEREGVMLIKKTAENIDEAAG SSSVYYYRITYG  
105 ETGGNSPVQEFTVPYSSSTATISGLSPGVDYTITVYAWGEDSAGYMFMYSPISINYRTC\*

106

107 HA4-AsLOV2 (NS47 insertion):

108 GSSVSSVPTKLEVVAATPTSLLISWDAPMSSSSVYYYRITYGETGGN GLERIEKNFVITDP  
109 RLPDNPIIFASDSFLQLTEYSREEILGRNCRFLQGPETDRATVRKIRDAIDNQTEVTVQLIN  
110 YTKSGKKFWNLFHLQPMRDQKGDVQYFIGVQLDGTEHVRDAAEREGVMLIKKTAENI  
111 DEAAGSPVQEFTVPYSSSTATISGLSPGVDYTITVYAWGEDSAGYMFMYSPISINYRTC\*

112

113 HA4-AsLOV2 (SA84 insertion):

114 GSSVSSVPTKLEVVAATPTSLLISWDAPMSSSSVYYYRITYGETGGNSPVQEFTVPYSSST  
115 ATISGLSPGVDYTITVYAWGEDS GLERIEKNFVITDPRLPDNPIIFASDSFLQLTEYSREEIL  
116 GRNCRFLQGPETDRATVRKIRDAIDNQTEVTVQLINYTKSGKKFWNLFHLQPMRDQK  
117 DVQYFIGVQLDGTEHVRDAAEREGVMLIKKTAENIDEAAG AGYMFMYSPISINYRTC\*

118

119 YFP-SH2:

120 MASKVSKGEELFTGVVPILVELDGDVNGHKFSVSGEGEGDATYGKLTCLKFICTTGKLPV  
121 PWPTLVTTFGYGLQCFARYPDHMKQHDFFKSAMPEGYVQERTIFFKDDGNYKTRAEVK  
122 FEGDTLVNRIELKGIDFKEDGNILGHKLEYNYNSHNVYIMADKQKNGIKVNFKIRHNIED  
123 GSVQLADHYQQNTPIGDGPVLLPDNHYLSTQSALS KDPNEKRDMVLLLEFVTAAGITL  
124 MDELKYSLEKHSWYHGPVSRNAEYLLSSGINGSFLVRESESSPGQRSISLRYEGRVYH

125 YRINTASDGKLYVSSESRFNTLAELVHHHSTVADGLITTLHYPAPKRNKPTVYGVSPNY\*  
126  
127  
128 His<sub>6</sub>-HA4:  
129 HHHHHHSSGENLYFQGHASGSSVSSVPTKLEVVAATPTSLLISWDAPMSSSSVYYYRITY  
130 GETGGNSPVQEFTVPYSSSTATISGLSPGVDYTITVYAWGEDSAGYMFMYSPISINYRTC  
131 \*  
132  
133 HA4-AsLOV2 (TG44 insertion):  
134 GSSVSSVPTKLEVVAATPTSLLISWDAPMSSSSVYYYRITYGETGLERIEKNFVITDPRLP  
135 DNPIIFASDSFLQLTEYSREEILGRNCRFLQGPETDRATVRKIRDAIDNQTEVTVQLINYTK  
136 SGKKFWNLFHLQPMRDQKGDVQYFIGVQLDGTEHVRDAAEREGVMLIKKTAENIDEA  
137 AGGGNSPVQEFTVPYSSSTATISGLSPGVDYTITVYAWGEDSAGYMFMYSPISINYRTC\*  
138  
139 HA4-AsLOV2 (SG65 insertion):  
140 GSSVSSVPTKLEVVAATPTSLLISWDAPMSSSSVYYYRITYGETGGNSPVQEFTVPYSSST  
141 ATISGLERIEKNFVITDPRLPDNPIIFASDSFLQLTEYSREEILGRNCRFLQGPETDRATVRK  
142 IRDAIDNQTEVTVQLINYTKSGKKFWNLFHLQPMRDQKGDVQYFIGVQLDGTEHVRDA  
143 AEREGVMLIKKTAENIDEAAGGLSPGVDYTITVYAWGEDSAGYMFMYSPISINYRTC\*  
144  
145 HA4-AsLOV2 (DA26 insertion):  
146 GSSVSSVPTKLEVVAATPTSLLISWDGLERIEKNFVITDPRLPDNPIIFASDSFLQLTEYSRE  
147 EILGRNCRFLQGPETDRATVRKIRDAIDNQTEVTVQLINYTKSGKKFWNLFHLQPMRDQ  
148 KGDVQYFIGVQLDGTEHVRDAAEREGVMLIKKTAENIDEAAGAPMSSSSVYYYRITYGE  
149 TGGNSPVQEFTVPYSSSTATISGLSPGVDYTITVYAWGEDSAGYMFMYSPISINYRTC\*  
150  
151 HA4-AsLOV2 (ED82 insertion):  
152 GSSVSSVPTKLEVVAATPTSLLISWDAPMSSSSVYYYRITYGETGGNSPVQEFTVPYSSST  
153 ATISGLSPGVDYTITVYAWGEGLERIEKNFVITDPRLPDNPIIFASDSFLQLTEYSREEILGR  
154 NCRFLQGPETDRATVRKIRDAIDNQTEVTVQLINYTKSGKKFWNLFHLQPMRDQKGDV  
155 QYFIGVQLDGTEHVRDAAEREGVMLIKKTAENIDEAAGDSAGYMFMYSPISINYRTC\*  
156  
157 HA4-AsLOV2 (DS83 insertion):  
158 GSSVSSVPTKLEVVAATPTSLLISWDAPMSSSSVYYYRITYGETGGNSPVQEFTVPYSSST  
159 ATISGLSPGVDYTITVYAWGEDGLERIEKNFVITDPRLPDNPIIFASDSFLQLTEYSREEILG  
160 RNCRFLQGPETDRATVRKIRDAIDNQTEVTVQLINYTKSGKKFWNLFHLQPMRDQKGD  
161 VQYFIGVQLDGTEHVRDAAEREGVMLIKKTAENIDEAAGSAGYMFMYSPISINYRTC\*  
162  
163 HA4-AsLOV2 (GG45 insertion):  
164 GSSVSSVPTKLEVVAATPTSLLISWDAPMSSSSVYYYRITYGETGGLERIEKNFVITDPRL  
165 PDNPIIFASDSFLQLTEYSREEILGRNCRFLQGPETDRATVRKIRDAIDNQTEVTVQLINYT  
166 KSGKKFWNLFHLQPMRDQKGDVQYFIGVQLDGTEHVRDAAEREGVMLIKKTAENIDE  
167 AAGGNSPVQEFTVPYSSSTATISGLSPGVDYTITVYAWGEDSAGYMFMYSPISINYRTC\*  
168  
169 HA4-AsLOV2 (PT18 insertion):  
170 GSSVSSVPTKLEVVAATPGLERIEKNFVITDPRLPDNPIIFASDSFLQLTEYSREEILGRNCR



171 FLQGPETDRATVRKIRDAIDNQTEVTVQLINYTKSGKKFWNLFHLQPMRDQKGDVQYFI  
172 GVQLDGTEHVRDAAEREGVMLIKKTAENIDEAAGTSSLISWDAPMSSSSVYYYRITYGE  
173 TGGNSPVQEFTVPYSSSTATISGLSPGVDYTITVYAWGEDSAGYMFMYSPISINYRTC\*

174  
175 HA4-AsLOV2 (SP68 insertion):  
176 GSSVSSVPTKLEVVAATPTSLLISWDAPMSSSSVYYYRITYGETGGNSPVQEFTVPYSSST  
177 ATISGLSGLERIEKNFVITDPRLPDNPIIFASDSFLQLTEYSREEILGRNCRFLQGPETDRAT  
178 VRKIRDAIDNQTEVTVQLINYTKSGKKFWNLFHLQPMRDQKGDVQYFIGVQLDGTEHV  
179 RDAEREGVMLIKKTAENIDEAAGPGVDYTITVYAWGEDSAGYMFMYSPISINYRTC\*

180  
181 AsLOV2-HA4 (N-terminus):  
182 GLERIEKNFVITDPRLPDNPIIFASDSFLQLTEYSREEILGRNCRFLQGPETDRATVRKIRD  
183 AIDNQTEVTVQLINYTKSGKKFWNLFHLQPMRDQKGDVQYFIGVQLDGTEHVRDAAER  
184 EGVMLIKKTAENIDEAAGGSSVSSVPTKLEVVAATPTSLLISWDAPMSSSSVYYYRITYG  
185 ETGGNSPVQEFTVPYSSSTATISGLSPGVDYTITVYAWGEDSAGYMFMYSPISINYRTC\*

186  
187 AsLOV2-HA4 (C-terminus):  
188 GSSVSSVPTKLEVVAATPTSLLISWDAPMSSSSVYYYRITYGETGGNSPVQEFTVPYSSST  
189 ATISGLSPGVDYTITVYAWGEDSAGYMFMYSPISINYRTCGLERIEKNFVITDPRLPDNPII  
190 FASDSFLQLTEYSREEILGRNCRFLQGPETDRATVRKIRDAIDNQTEVTVQLINYTKSGKK  
191 FWNLFHLQPMRDQKGDVQYFIGVQLDGTEHVRDAAEREGVMLIKKTAENIDEAAG\*

192  
193 HA4-AsLOV2 (SS59 insertion):  
194 GSSVSSVPTKLEVVAATPTSLLISWDAPMSSSSVYYYRITYGETGGNSPVQEFTVPYSSG  
195 LERIEKNFVITDPRLPDNPIIFASDSFLQLTEYSREEILGRNCRFLQGPETDRATVRKIRDAI  
196 DNQTEVTVQLINYTKSGKKFWNLFHLQPMRDQKGDVQYFIGVQLDGTEHVRDAAERE  
197 GVMLIKKTAENIDEAAGSTATISGLSPGVDYTITVYAWGEDSAGYMFMYSPISINYRTC\*

198  
199 HA4-AsLOV2 (MY90 insertion):  
200 GSSVSSVPTKLEVVAATPTSLLISWDAPMSSSSVYYYRITYGETGGNSPVQEFTVPYSSST  
201 ATISGLSPGVDYTITVYAWGEDSAGYMFMLERIEKNFVITDPRLPDNPIIFASDSFLQLT  
202 EYSREEILGRNCRFLQGPETDRATVRKIRDAIDNQTEVTVQLINYTKSGKKFWNLFHLQP  
203 MRDQKGDVQYFIGVQLDGTEHVRDAAEREGVMLIKKTAENIDEAAGYSPISINYRTC\*

204  
205 His<sub>6</sub>-HA4-AsLOV2 (SS58 insertion):  
206 HHHHHHSSGENLYFQGHASGSSVSSVPTKLEVVAATPTSLLISWDAPMSSSSVYYYRITY  
207 GETGGNSPVQEFTVPYSGLERIEKNFVITDPRLPDNPIIFASDSFLQLTEYSREEILGRNCRF  
208 LQGPETDRATVRKIRDAIDNQTEVTVQLINYTKSGKKFWNLFHLQPMRDQKGDVQYFIG  
209 VQLDGTEHVRDAAEREGVMLIKKTAENIDEAAGSSSTATISGLSPGVDYTITVYAWGEDS  
210 AGYMFMYSPISINYRTC\*

211  
212 HA4-AsLOV2 (YS57 insertion):  
213 GSSVSSVPTKLEVVAATPTSLLISWDAPMSSSSVYYYRITYGETGGNSPVQEFTVPYGLE  
214 RIEKNFVITDPRLPDNPIIFASDSFLQLTEYSREEILGRNCRFLQGPETDRATVRKIRDAIDN  
215 QTEVTVQLINYTKSGKKFWNLFHLQPMRDQKGDVQYFIGVQLDGTEHVRDAAEREGV  
216 MLIKKTAENIDEAAGSSSTATISGLSPGVDYTITVYAWGEDSAGYMFMYSPISINYRTC\*

217  
218 His<sub>6</sub>-HA4-AsLOV2 (SS58 insertion, C450V mutant):  
219 HHHHHHSSGENLYFQGHASGSSVSSVPTKLEVVAATPTSL LISWDAPMSSSSVYYYRITY  
220 GETGGNSPVQEFTVPYSGLERIEKNFVITDPRLPDNPIIFASDSFLQLTEYSREEILGRNVR  
221 FLQGPETDRATVRKIRDAIDNQTEVTVQLINYTKSGKKFWNLFHLQPMRDQKGDVQYFI  
222 GVQLDGTEHVRDAAEREGVMLIKKTAENIDEAAGSSTATISGLSPGVDYTITVYAWGED  
223 SAGYMFMYSPISINYRTC\*

224  
225 SH2-PDC1:  
226 MGSLEKHSWYHG PVS RNAAEYLLSSGINGSFLVRESESSPGQRSISLRYEGRVYHYRINT  
227 ASDGKLYVSSESRFNTLAELVHHHSTVADGLITTLHYPAPKRNKPTVYGVSPNYASSEIT  
228 LGKYL FERLKQVNVNTVFGLPGDFNLSLLDKIYEVEGMRWAGNANELNAA YAADGYA  
229 RIKGMSCIITTFGVGELSALNGIAGSYAEHVGVLVHVVGVPSISAQAKQLLLHHTLGNNGDF  
230 TVFHRMSANISETTAMITDIATAPAEIDRCIRTTYVTQRPVYLGLPANLVDLNVPAKLLQ  
231 TPIDMSLKPND AESEKEVIDTILALVKDAKNPVILADACCSRHVDVKAETK KLIDL TQFPA  
232 FVTPMGKGSIDEQHPRYGGVYVGTLSKPEVKEAVESADLILSVGALLSDFNTGSFSYSY  
233 KTKNIVEFHSDHMKIRNATFPGVQMKFVLQKLLTTIADAAKGYKPVAVPARTPANAAV  
234 PASTPLKQEW MWNQLGNFLQEGDVVIAETGTSAFGINQTTFPNNTYGISQVLWGSIGFT  
235 TGATLGAAFAAE EIDPKKR VILFIGDGS LQLTVQEISTMIRWGLKPYL FVLNNDGYTIEKL  
236 IHGPKAQYNEIQGWDHLSLLPTFGAKDYETHRVATTGEWDKLTQDKSFNDNSKIRMIEI  
237 MLPVFDAPQNLVEQAKLTAATNAKQ\*

238  
239 His<sub>6</sub>-SUMO-HA4-AsLOV2 (SS58 insertion, V416I, G528A, N538E mutant):  
240 HHHHHHSGSGSDQEAKPSTEDLGDKKEGEYIKLKVIGQDSSEIHFVKMTTHLKKLKE  
241 SYCQRQGVPMNSL RFLFEGQRIADNHTPKELGMEEDVIEVYQEQTGGHMASKGSSVSS  
242 VPTKLEVVAATPTSL LISWDAPMSSSSVYYYRITYGETGGNSPVQEFTVPYSGLERIEKN  
243 FIITDPRLPDNPIIFASDSFLQLTEYSREEILGRNCRFLQGPETDRATVRKIRDAIDNQTEVT  
244 VQLINYTKSGKKFWNLFHLQPMRDQKGDVQYFIGVQLDGTEHVRDAAEREA VMLIKK  
245 TAAEIDEAAGSSTATISGLSPGVDYTITVYAWGEDSAGYMFMYSPISINYRTC\*

246  
247 His<sub>6</sub>-HA4-AsLOV2 (SS58 insertion, V416I mutant):  
248 HHHHHHSSGENLYFQGHASGSSVSSVPTKLEVVAATPTSL LISWDAPMSSSSVYYYRITY  
249 GETGGNSPVQEFTVPYSGLERIEKNFIITDPRLPDNPIIFASDSFLQLTEYSREEILGRNCRF  
250 LQGPETDRATVRKIRDAIDNQTEVTVQLINYTKSGKKFWNLFHLQPMRDQKGDVQYFIG  
251 VQLDGTEHVRDAAEREGVMLIKKTAENIDEAAGSSTATISGLSPGVDYTITVYAWGEDS  
252 AGYMFMYSPISINYRTC\*

253  
254 HA4-irFP  
255 MGSSVSSVPTKLEVVAATPTSL LISWDAPMSSSSVYYYRITYGETGGNSPVQEFTVPYSS  
256 STATISGLSPGVDYTITVYAWGEDSAGYMFMYSPISINYRTC GGGAEGSVARQPDL LTC  
257 DDEPIHIPGAIQPHGLLLALAADMTIVAGSDNLP ELTGLAIGALIGRSAADVDFDSETHNRL  
258 TIALAEPGAAVGAPITVGFTMRKDAGFIGSWHRHDQLIFLELEPPQRDVAEPQAFFRRTN  
259 SAIRRLQAAETLESACAAAAQEVRKITGFD RVM IYRFASDFSGEVIAEDRCAEVESKLGL  
260 HYPASTVPAQARRLYTINPVRIIPDIN YRPVPVTPDLN PVTGRPIDLSFAILRSVSPVHLEF  
261 MRNIGMHGTMSISILRGERLWGLIVCHHRTPY YVDLDGRQACELVAQVLA WQIGVMEE  
262 AAATPTCNMRD\*

263  
264  
265  
266  
267  
268  
269  
270  
271  
272  
273  
274  
275  
276  
277  
278  
279  
280  
281  
282  
283  
284  
285  
286  
287  
288  
289  
290  
291  
292  
293  
294  
295  
296  
297  
298  
299  
300  
301

HA4-AsLOV2-irFP (SS58 insertion)

MGSSVSSVPTKLEVVAATPTSLLISWDAPMSSSSVYYRITYGETGGNSPVQEFTVPYSG  
LERIEKNFVITDPRLPDNPIIFASDSFLQLTEYSREEILGRNCRFLQGPETDRATVRKIRDAI  
DNQTEVTVQLINYTKSGKKFWNLFHLQPMRDQKGDVQYFIGVQLDGTGTEHVRDAAERE  
GVMLIKKTAENIDEAA GSSTATISGLSPGVDYTTITVYAWGEDSAGYMFMYSPISINYRTC  
GGGAEGSVARQPDLTCDDEPIHIPGAIQPHGLLLALAADMTIVAGSDNLPELTGLAIGA  
LIGRSAADVFDSETHNRLTIALAEPGAAVGAPITVGFTMRKDAGFIGSWHRHDQLIFLEL  
EPPQRDVAEPQAFFRRTNSAIRRLQAAETLESACAAAQEVKITGFDRVMIYRFASDFS  
GEVIAEDRCAEVESKLGHPASTVPAQARRLYTINPVRIIPDINYPVPVTPDLNPVTGR  
PIDLSFAILRSVSPVHLEFMRNIGMHGTMSISILRGERLWGLIVCHHRTPYYVDLDGRQA  
CELVAQVLAWQIGVMEEAAATPTCNMRD\*

SH2-mCherry-CAAX

MSLEKHSWYHGPVSRNAAEYLLSSGINGSFLVRESESSPGQRSISLRYEGRVYHYRINTA  
SDGKLYVSSESRFNTLAELVHHHSTVADGLITTLHYAPKRNKPTVYGVSPNYVSKGEE  
DNMAIIEKFMRFKVHMEGSVNGHEFEIEGEGEGRPYEGTQTAKLKVTKGGPLPFAWDIL  
SPQFMYGSKAYVKHPADIPDYLKLSFPEGFKWERVMNFEDGGVVTVTQDSSLQDGEFI  
YKVKLRGTFNPSDGPVMQKKTMGWEASSERMYPEDGALKGEIKQRLKLDGGGHYDAE  
VKTTYKAKKPVQLPGAYNVNIKLDITSHNEDYTIVEQYERAEGRHSTGGMDELYKGS  
SGSKKKKKKSKTKCVM

## Supplementary Note 2

We performed a search for monobodies in the Protein Data Bank (PDB), using “monobody” as key word. Our search resulted in a total of 51 different structures of monobodies, each one in complex with their cognate target. From this total, only 32 were monobodies with unique protein sequences, which are included in Supplementary Table 3. A close inspection of the mode of binding of each unique monobody in complex with its target revealed that 23 (72%) of them bind their cognate targets in a side-binding mode, including monobody HA4 (see Supplementary Figure 6). The side-binding mode involves the Loop FG, one or more of the  $\beta$ -strands from  $\beta$ S2 and, occasionally, the CD loop.

302 **Supplementary Tables**

303

304 **Supplementary Table 1. List of HA4-AsLOV2 chimeras showing insertion positions.**

| Chimera Name | Positions in HA4 where AsLOV2 was inserted               |
|--------------|----------------------------------------------------------|
| SS30         | Inserted between S30 and S31                             |
| NS47         | Inserted between N47 and S48                             |
| SA84         | Inserted between S84 and A85                             |
| TG44         | Inserted between T44 and G45                             |
| SS58         | Inserted between S58 and S59                             |
| SG65         | Inserted between S65 and G66                             |
| DA26         | Inserted between D26 and A27                             |
| MS29         | Inserted between M29 and S30                             |
| MS29-3       | Inserted between M29 and S33 residues 30-32 were removed |
| ED82         | Inserted between E82 and D83                             |
| DS83         | Inserted between D83 and S84                             |
| GG45         | Inserted between G45 and G46                             |
| GN45         | Inserted between G45 and N48 residues 46-47 were removed |
| TN44         | Inserted between T44 and N48 residues 45-47 were removed |
| PT18         | Inserted between P18 and T19                             |
| SP68         | Inserted between S68 and P69                             |
| SP68-1       | Inserted between S68 and P69 residue 67 was removed      |
| N-terminus   | Inserted at N-terminus                                   |
| C-terminus   | Inserted at C-terminus                                   |
| SS59         | Inserted between S59 and S60                             |
| PT18         | Inserted between P18 and T19 residue 17 was removed      |
| MY90         | Inserted between M90 and Y91                             |
| YS57         | Inserted between Y57 and S58                             |

305

306

307 **Supplementary Table 2. Rate and dissociation constants from all individual BLI**308 **experiments.**

| Variant                                | State measured    | Illumination | $k_{on}$ ( $\mu\text{M}^{-1} \text{s}^{-1}$ ) | $k_{off}$ ( $\text{s}^{-1}$ ) | $K_d$ ( $\mu\text{M}$ ) |
|----------------------------------------|-------------------|--------------|-----------------------------------------------|-------------------------------|-------------------------|
| Monobody HA4                           | -                 | ambient      | 0.0631                                        | 0.0145                        | 0.23                    |
| OptoMB 1                               | Lit conformation  | ambient*     | <0.001                                        | 0.34                          | >100                    |
| OptoMB 2                               | Lit conformation  | 450 nm light | <0.001                                        | 0.21                          | >100                    |
| OptoMB <sub>C450V</sub> 1              | Dark conformation | ambient**    | 0.11                                          | 0.006                         | 0.06                    |
| OptoMB <sub>C450V</sub> 2              | Dark conformation | ambient**    | 0.056                                         | 0.013                         | 0.23                    |
| OptoMB <sub>C450V</sub> 3              | Dark conformation | 450 nm light | 0.048                                         | 0.013                         | 0.27                    |
| OptoMB <sub>V416L</sub> 1              | Lit conformation  | ambient*     | 0.0029                                        | 0.25                          | 87                      |
| OptoMB <sub>V416L</sub> 2              | Lit conformation  | 450 nm light | 0.0033                                        | 0.20                          | 60                      |
| OptoMB <sub>V416L</sub> 3              | Lit conformation  | 450 nm light | 0.0058                                        | 0.24                          | 42                      |
| #OptoMB <sub>V416L_G528A_N538E</sub> 1 | Lit conformation  | ambient*     | <0.001                                        | 0.10                          | >100                    |
| #OptoMB <sub>V416L_G528A_N538E</sub> 2 | Lit conformation  | ambient*     | <0.001                                        | 0.13                          | >100                    |

309 \*Due to the sensitivity of these constructs, ambient light in the laboratory as well as internal light from the digital  
 310 panels of the Octet (BLI instrument) was sufficient to trigger the lit conformation. \*\*This is a light-insensitive mutant  
 311 and neither ambient nor LED light affected its basal dark conformation.

312 #SUMO tagged

313 **Supplementary Table 3. Structurally characterized monobodies and their target binding**  
 314 **mode (source: PDB).**

| PDB code | Monobody   | Target                                | Binding Mode  | Library*      | Ref.                                                                |
|----------|------------|---------------------------------------|---------------|---------------|---------------------------------------------------------------------|
| 2OCF     | E2#23      | Human estrogen receptor               | Side Binding  | FG-Loop (FG7) | Koide <i>et al.</i> , 2002 <sup>1</sup>                             |
| 3K2M     | HA4        | Abl1 SH2 domain                       | Side Binding  | Loops-only    | Wojcik <i>et al.</i> , 2010 <sup>2</sup>                            |
| 3QHT     | ySMB-1     | Yeast SUMO                            | Side Binding  | Loops-only    | Gilbreth <i>et al.</i> , 2011 <sup>3</sup>                          |
| 3RZW     | ySMB-9     | Human SUMO                            | Loops Binding | Loops-only    | Koide <i>et al.</i> , 2012 <sup>4</sup>                             |
| 3T04     | 7c12       | Abl1 SH2 domain                       | Side Binding  | Loops-only    | Grebien <i>et al.</i> , 2011 <sup>5</sup>                           |
| 3UYO     | SH13       | Abl1 SH2 domain                       | Side Binding  | Side and Loop | Koide <i>et al.</i> , 2012 <sup>4</sup>                             |
| 4HUK     | MbMATE1    | MATE multidrug transporter            | Side Binding  | Loops-only    | Lu <i>et al.</i> , 2013 <sup>6</sup>                                |
| 4JE4     | NSa1       | NHP2 N-SH2 domain                     | Side Binding  | Side and Loop | Sha <i>et al.</i> , 2013 <sup>7</sup>                               |
| 4JEG     | CS1        | NHP2 C-SH2 domain                     | Side Binding  | Side and Loop | Sha <i>et al.</i> , 2013 <sup>7</sup>                               |
| 5A40     | Bpe-S7     | Fluoride Ion channel                  | Side Binding  | Side and Loop | Stockbridge <i>et al.</i> , 2014 <sup>8</sup> and 2015 <sup>9</sup> |
| 5A43     | Bpe-L2     | Fluoride Ion channel                  | Loops Binding | Loops-only    | Stockbridge <i>et al.</i> , 2014 <sup>8</sup> and 2015 <sup>9</sup> |
| 5DC0     | GG3        | Abl1 SH2 domain                       | Side Binding  | Side and Loop | Wojcik <i>et al.</i> , 2016 <sup>10</sup>                           |
| 5DC4     | AS25       | Abl1 SH2 domain                       | Side Binding  | Side and Loop | Wojcik <i>et al.</i> , 2016 <sup>10</sup>                           |
| 5E95     | NS1        | H-RAS                                 | Side Binding  | Side and Loop | Spencer-Smith <i>et al.</i> , 2017 <sup>11</sup>                    |
| 5ECJ     | S4         | Prdm14                                | Side Binding  | Not specified | Nady <i>et al.</i> , 2015 <sup>12</sup>                             |
| 5G15     | Mb1        | Aurora A                              | Loops Binding | Not specified | Zorba <i>et al.</i> , 2019 <sup>13</sup>                            |
| 5KBN     | S9         | Fluoride channel F80I Mutant          | Loops Binding | Side and Loop | Last <i>et al.</i> , 2016 <sup>14</sup>                             |
| 5KVM     | $\alpha 5$ | GPR56 ERC                             | Side Binding  | Side and Loop | Salzman <i>et al.</i> , 2016 <sup>15</sup>                          |
| 5MTJ     | Yes_1      | Yes1-SH2                              | Side Binding  | Side and Loop | Kükenshöner <i>et al.</i> , 2017 <sup>16</sup>                      |
| 5MTM     | Lck_3      | Lck-SH2                               | Side Binding  | Side and Loop | Kükenshöner <i>et al.</i> , 2017 <sup>16</sup>                      |
| 5MTN     | Lck_3      | Lck-SH2                               | Side Binding  | Side and Loop | Kükenshöner <i>et al.</i> , 2017 <sup>16</sup>                      |
| 5N7E     | Bcr-DH_4   | Dbl homology domain of Bcr-Abl        | Side Binding  | Side and Loop | Reckel <i>et al.</i> , 2017 <sup>17</sup>                           |
| 5NKQ     | Ec2-S9     | Fluoride Ion channel                  | Side Binding  | Side and Loop | Stockbridge <i>et al.</i> , 2015 <sup>9</sup>                       |
| 5OC7     | Bcr-PH_4   | Pleckstrin-homology domain of Bcr-Abl | Side Binding  | Not specified | Reckel <i>et al.</i> , 2017 <sup>17</sup>                           |

|      |        |                                      |               |               |                                                                                               |
|------|--------|--------------------------------------|---------------|---------------|-----------------------------------------------------------------------------------------------|
| 5V7P | MbRas1 | Ras Methyltransferase ICMT           | Loops Binding | Not specified | Diver <i>et al.</i> , 2018 <sup>18</sup>                                                      |
| 6APX | YSX1   | Human phosphatase 1 catalytic domain | Loops Binding | Loops-only    | Gumpena <i>et al.</i> , 2017 <sup>19</sup>                                                    |
| 6BQO | Bpe-S8 | Fluoride Ion channel                 | Side Binding  | Side and Loop | Stockbridge <i>et al.</i> , 2014 <sup>8</sup> and McIlwain <i>et al.</i> , 2017 <sup>20</sup> |
| 6BX4 | S9m    | Fluoride Ion channel                 | Loops Binding | Side and Loop | Turman <i>et al.</i> , 2018 <sup>21</sup>                                                     |
| 6BX5 | S12    | Fluoride Ion channel                 | Loops Binding | Side and Loop | Turman <i>et al.</i> , 2018 <sup>21</sup>                                                     |
| 6BYN | S4     | WDR5                                 | Side Binding  | Side and Loop | Gupta <i>et al.</i> , 2018 <sup>22</sup>                                                      |
| 6C83 | Mb2    | Aurora A                             | Loops Binding | Not specified | Zorba <i>et al.</i> , 2019 <sup>13</sup>                                                      |
| 6D0J | X1     | CLC-Fluoride proton antiporter       | Side Binding  | Not specified | Last <i>et al.</i> , 2018 <sup>23</sup>                                                       |

315 \*Loops-only library diversified Loops BC, DE and FG; the Side and Loop libraries have at least two versions reported,  
316 one includes diversification of FG loop and several positions in  $\beta$ S2; another library diversifies the Loop CD in  
317 addition to FG and the positions in  $\beta$ S2; the FG-Loop library diversifies only the Loop FG.  
318  
319  
320  
321  
322  
323  
324  
325  
326  
327  
328  
329  
330  
331  
332  
333  
334  
335  
336  
337  
338  
339  
340  
341  
342  
343  
344  
345  
346  
347

348 **Supplementary Table 4. Constructs used in this study.**

| Plasmid | Tag                    | Protein                                                  | Marker     | Vector type |
|---------|------------------------|----------------------------------------------------------|------------|-------------|
| EZ-L663 | None                   | HA4                                                      | Kanamycin  | pCri-7b     |
| EZ-L664 | His <sub>6</sub>       | YFP-SH2                                                  | Kanamycin  | pCri-8b     |
| EZ-L703 | None                   | YFP-SH2                                                  | Kanamycin  | pCri-7b     |
| EZ-L704 | His <sub>6</sub>       | HA4                                                      | Kanamycin  | pCri-8b     |
| EZ-L706 | None                   | HA4-AsLOV2 (SS58 insertion)                              | Kanamycin  | pCri-7b     |
| EZ-L736 | None                   | HA4-AsLOV2 (MS29 insertion, residues 30-32 were removed) | Kanamycin  | pCri-7b     |
| EZ-L747 | None                   | HA4-AsLOV2 (SS59 insertion)                              | Kanamycin  | pCri-7b     |
| EZ-L765 | His <sub>6</sub>       | HA4-AsLOV2 (SS58 insertion)                              | Kanamycin  | pCri-8b     |
| EZ-L830 | His <sub>6</sub> -SUMO | HA4-AsLOV2 (SS58 insertion, V416L mutant)                | Kanamycin  | pCri-11b    |
| EZ-L884 | His <sub>6</sub>       | HA4-AsLOV2 (SS58 insertion, C450V mutant)                | Kanamycin  | pCri-8b     |
| EZ-L886 | None                   | SH2-PDC1                                                 | Kanamycin  | pCri-7b     |
| EZ-L889 | His <sub>6</sub> -SUMO | HA4-AsLOV2 (SS58 insertion, V416I, G528A, N538E mutant)  | Kanamycin  | pCri-11b    |
| EZ-L892 | His <sub>6</sub>       | HA4-AsLOV2 (SS58 insertion, V416I mutant)                | Kanamycin  | pCri-8b     |
| AG-pHR1 | None                   | HA4-iRFP                                                 | Ampicillin | pHR         |
| AG-pHR2 | None                   | HA4-AsLOV2-iRFP (SS58 insertion)                         | Ampicillin | pHR         |
| AG-pHR3 | CAAX                   | SH2-mCherry-CAAX                                         | Ampicillin | pHR         |

349  
350  
351  
352  
353  
354  
355  
356  
357



358 **Supplementary Figures**

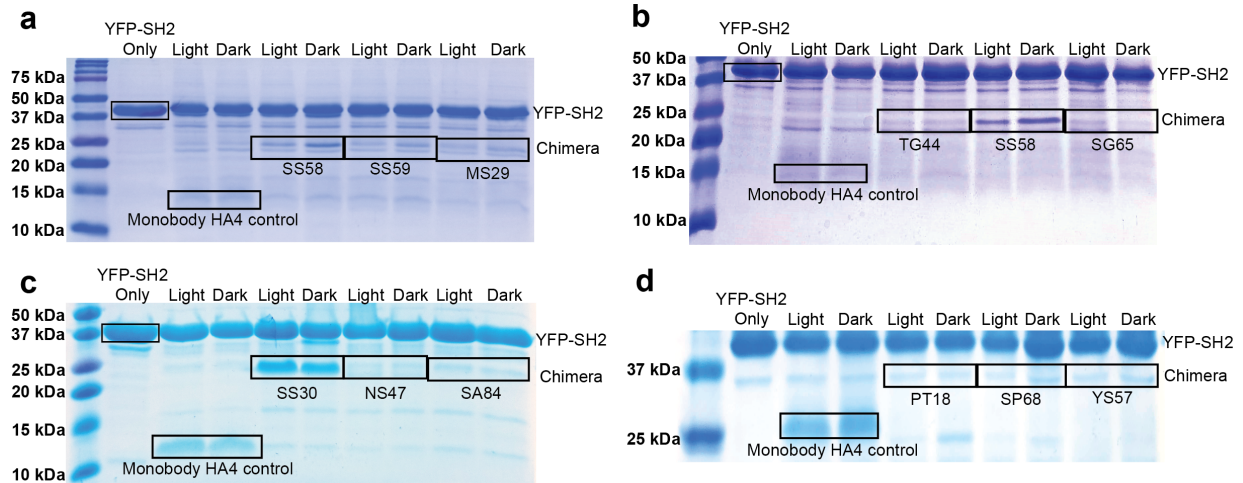

359

360 **Supplementary Fig. 1: Representative SDS-PAGE gels of pull-down screens of HA4-**  
 361 **AsLOV2 chimeras. a**, Complete SDS-PAGE gel of the results shown in Fig. 1d, including  
 362 chimeras with the AsLOV2 domain inserted in positions SS58, SS59 and MS29 of HA4 (with  
 363 residues S30 to S32 of Loop BC deleted). **b-d**, A representative sample of SDS-PAGE gels of  
 364 other chimeras with the AsLOV2 domain inserted in different positions that either do not bind or  
 365 bind poorly to SH2 (TG44, NS47, SA84, YS57 and PT18) including at two positions in Loop EF  
 366 (SG65, SP68); or bind well to SH2, but show no difference in binding between light conditions  
 367 (SS30). All pull-downs were repeated at least twice observing similar results.

368



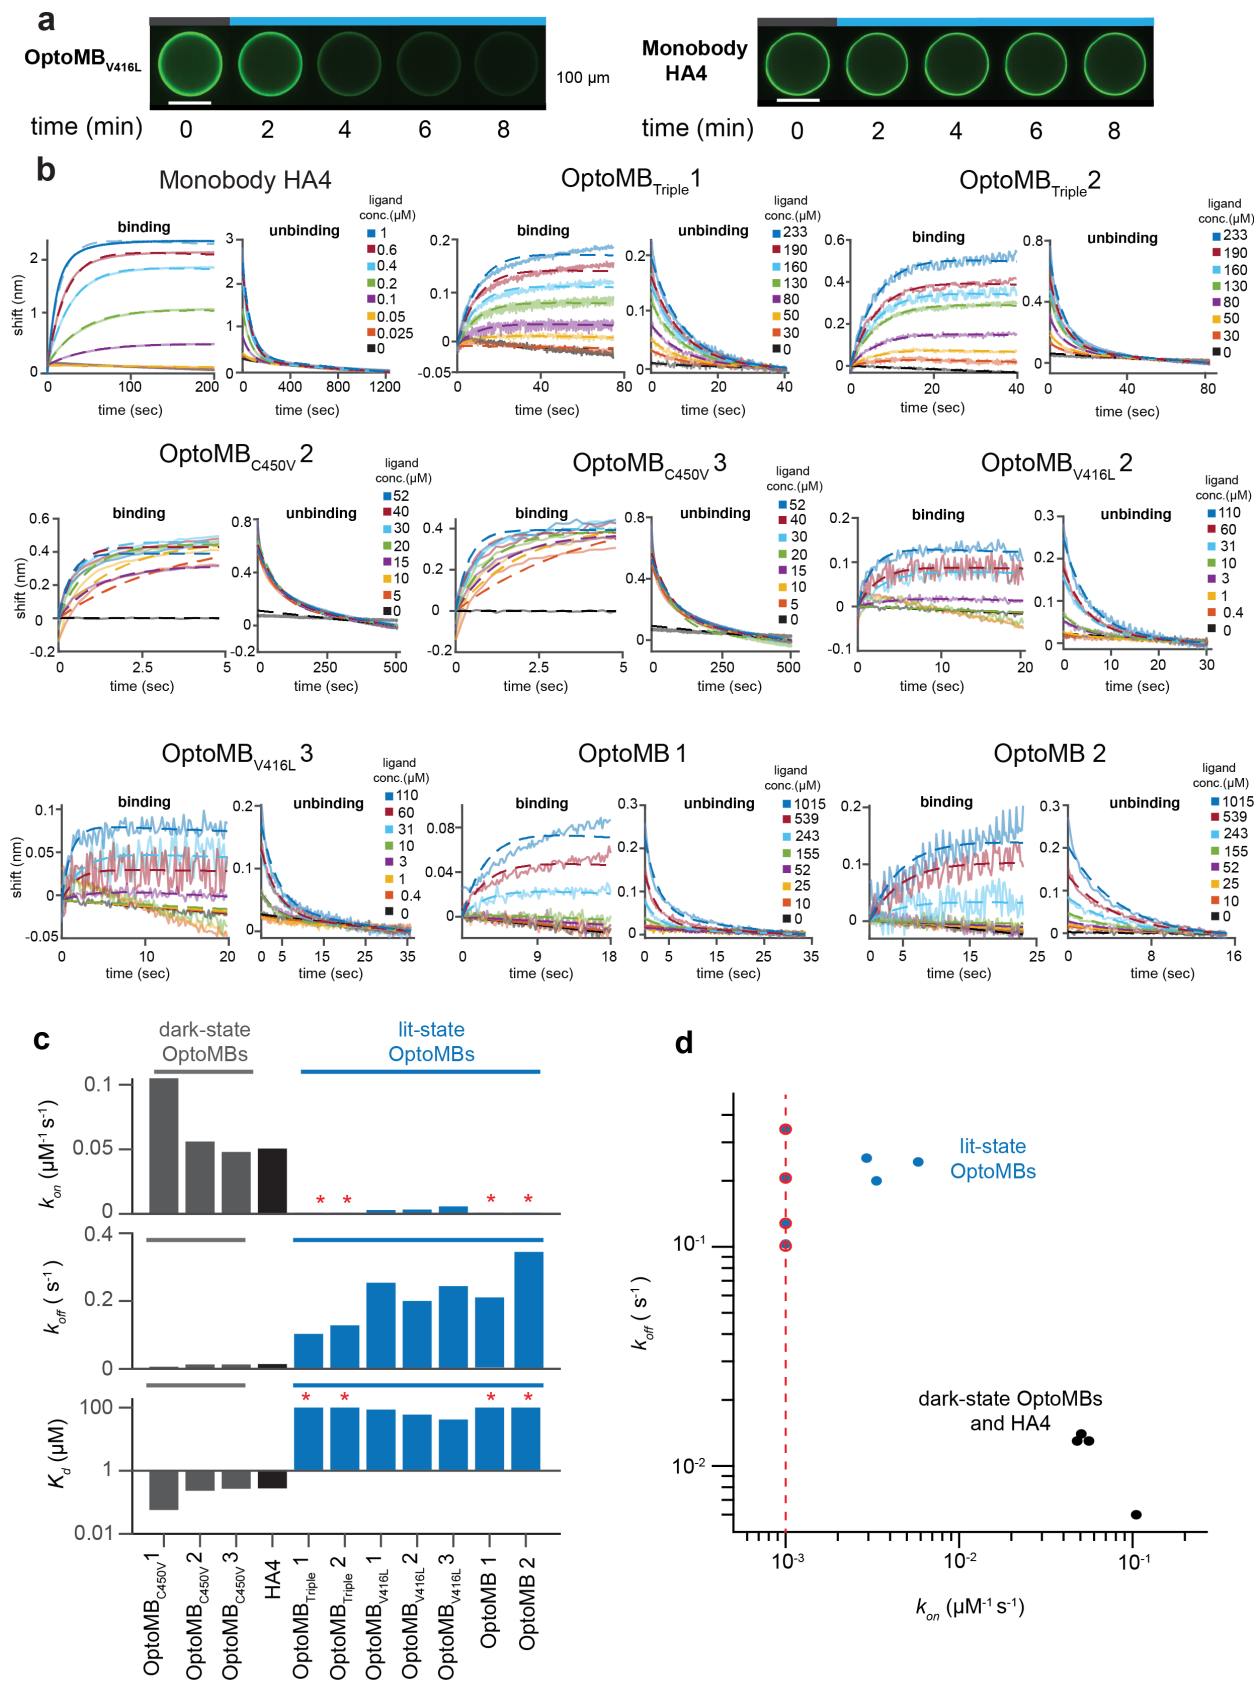

370 **Supplementary Fig. 2: *In vitro* characterization of OptoMB binding.** **a**, Time course of  
371 fluorescence microscopy images of YFP-SH2 binding to agarose beads conjugated with  
372 OptoMB<sub>V416L</sub> (left panel) or HA4 as control (right panel). Starting with beads incubated in the  
373 dark, time course begins upon blue light stimulation ( $t = 0$ ), followed by a sequence of images  
374 taken every 2 min for a total of 8 min. Scale bar (white) represents 100  $\mu\text{m}$ . **b**, BLI  
375 measurements of binding (left) and unbinding (right) of YFP-SH2 to immobilized monobody  
376 HA4, and several replicates for OptoMB, OptoMB<sub>C450V</sub>, OptoMB<sub>V416L</sub> and  
377 OptoMB<sub>V416L\_G528A\_N538E</sub> in different light conditions (see Supplementary Table 2). **c**,  
378 Comparison of binding ( $k_{on}$ ), unbinding ( $k_{off}$ ), and dissociation ( $K_d$ ) constants calculated from  
379 BLI measurements for different OptoMB variants, corresponding to dark (gray or black) or lit  
380 (blue) states, including replicates. The red asterisks highlight measurements of  $k_{on}$  below the  
381 limit of detection of  $0.001 \mu\text{M}^{-1}\text{s}^{-1}$ . To calculate  $K_d$  values from measurements below this limit,  
382 we used  $k_{on} = 0.001 \mu\text{M}^{-1}\text{s}^{-1}$ . OptoMB<sub>Triple</sub> refers to the OptoMB<sub>V416L\_G528A\_N538E</sub> variant. **d**,  
383 Comparison of the binding and unbinding rate constants,  $k_{on}$  and  $k_{off}$ , for replicate measurements  
384 of the different OptoMB variants in their respective dark (black points) or lit (blue points) states.  
385 Measurements of  $k_{on}$  below the limit of detection (red dashed line) were assigned the limit  $k_{on} =$   
386  $0.001 \mu\text{M}^{-1}\text{s}^{-1}$  (red points). Source data are provided as a Source Data file.

387

388

389

390

391

392

393

394

395

396

397

398

399

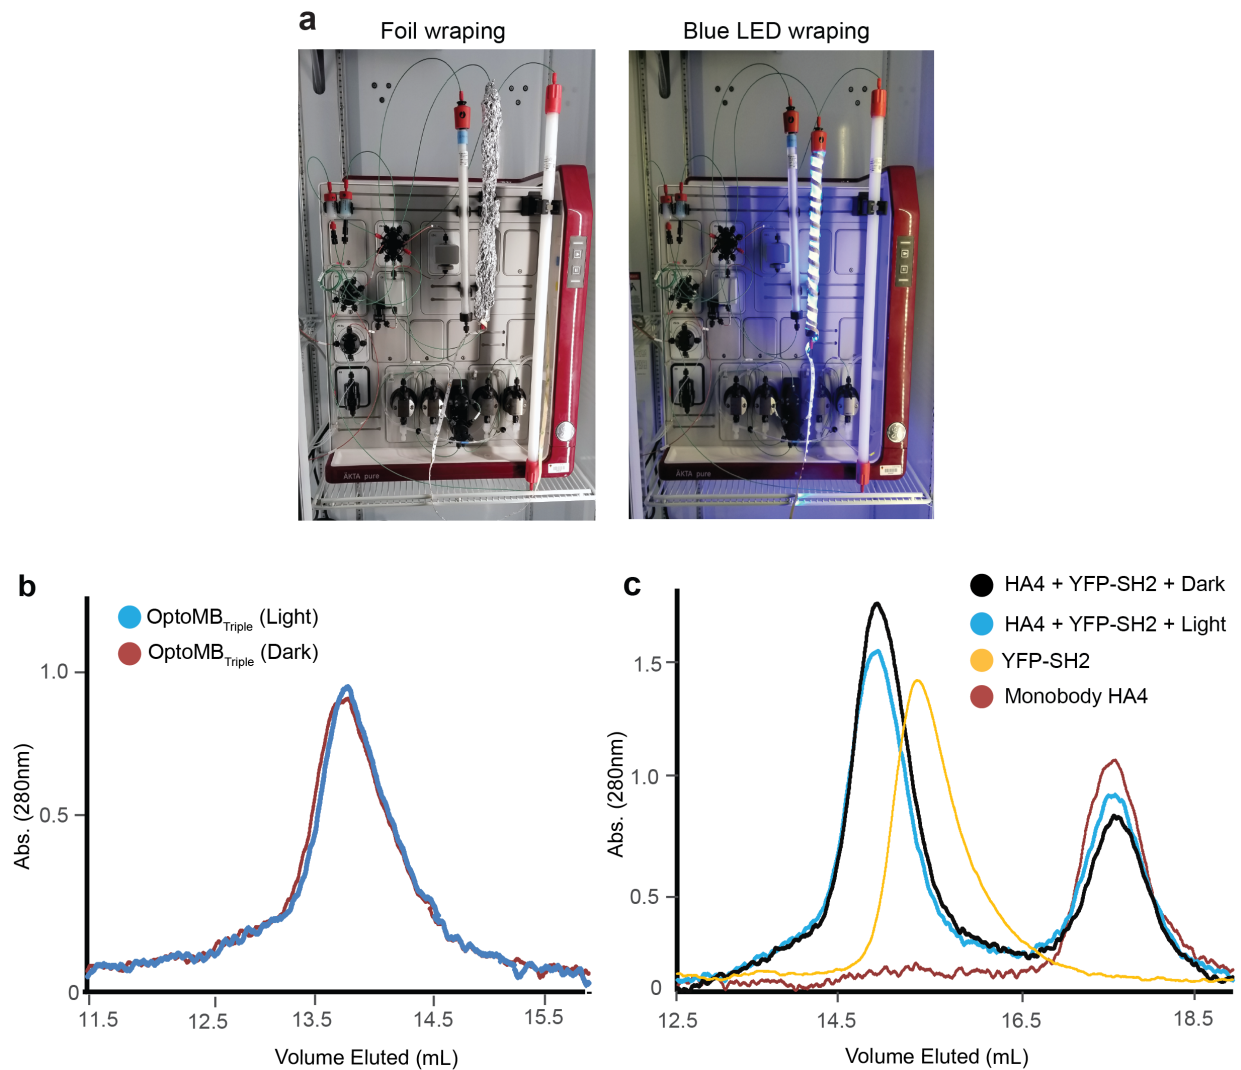

400

401 **Supplementary Fig. 3: *In vitro* characterization of OptoMB binding in solution by size**

402 **exclusion chromatography.** **a**, Experimental setup for dark or lit size exclusion chromatography

403 experiments using a Superdex 200 16/300 column (GE®). For experiments in the dark (left), the

404 column was wrapped with thick aluminum foil, and the chromatography refrigerator covered

405 with a black blanket to avoid light contamination (not shown). For experiments in the light

406 (right), the column was wrapped with blue LEDs. **b**, Size exclusion chromatography control

407 experiments for SUMO-tagged OptoMB<sub>V416I\_G528A\_N538E</sub> (OptoMB<sub>Triple</sub>) in light (blue) and dark

408 (red). **c**, Size exclusion chromatography control experiments to show identical elution profiles

409 for the HA4-YFP-SH2 complex in dark (black) or light (blue) conditions. Purified YFP-SH2

410 (yellow) and HA4 monobody (red) are also shown as controls. Source data are provided as a

411 Source Data file.

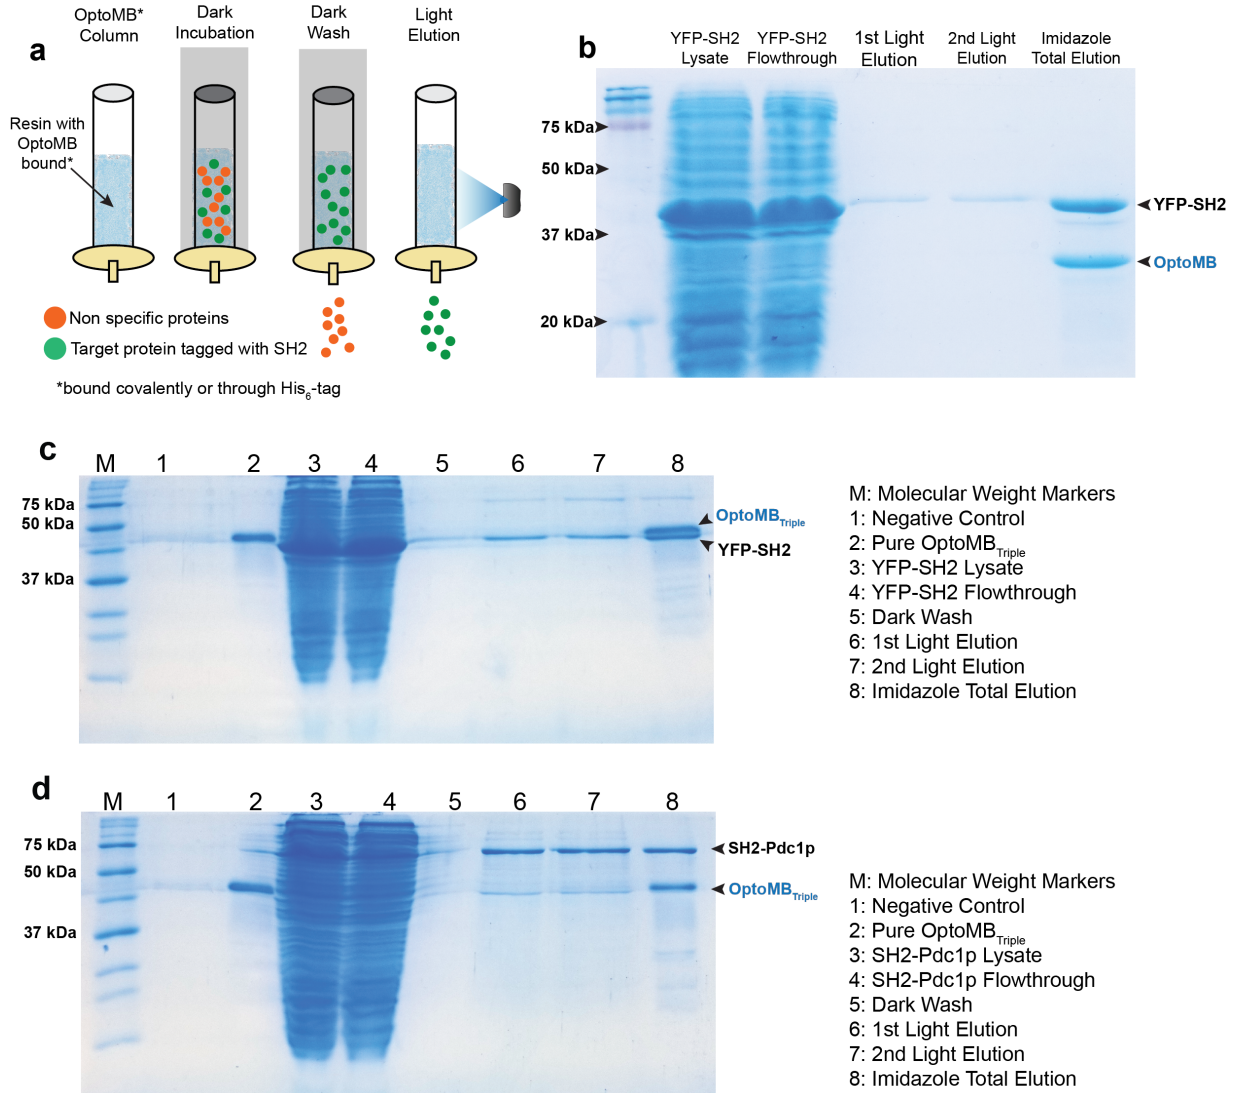

412  
 413 **Supplementary Fig. 4: Light-Controlled Affinity Chromatography (LCAC) to purify SH2-**  
 414 **tagged proteins using OptoMB immobilized on  $\text{Co}^{2+}$  agarose beads.** **a**, Schematic diagram of  
 415 LCAC procedure using a column packed with OptoMB-coated agarose beads. After flowing  
 416 through crude extract and washing in the dark, elution is carried out by applying blue light to the  
 417 surface of the column. **b**, SDS-PAGE gel of YFP-SH2 purified using a column packed with  
 418 OptoMB agarose beads. **c**, SDS-PAGE gel of YFP-SH2 purified using a column packed with  
 419 SUMO-tagged OptoMB<sub>V416I\_G528A\_N538E</sub> (OptoMB<sub>Triple</sub>) agarose beads. **d**, SDS-PAGE gel of  
 420 SH2-Pdc1p purified using a column packed with SUMO-tagged OptoMB<sub>V416I\_G528A\_N538E</sub> agarose  
 421 beads. The “negative control” **c,d**, are final elutions from columns that were not exposed to  
 422 crude extracts, but were otherwise treated the same. Purifications were repeated at least three  
 423 times observing similar results.

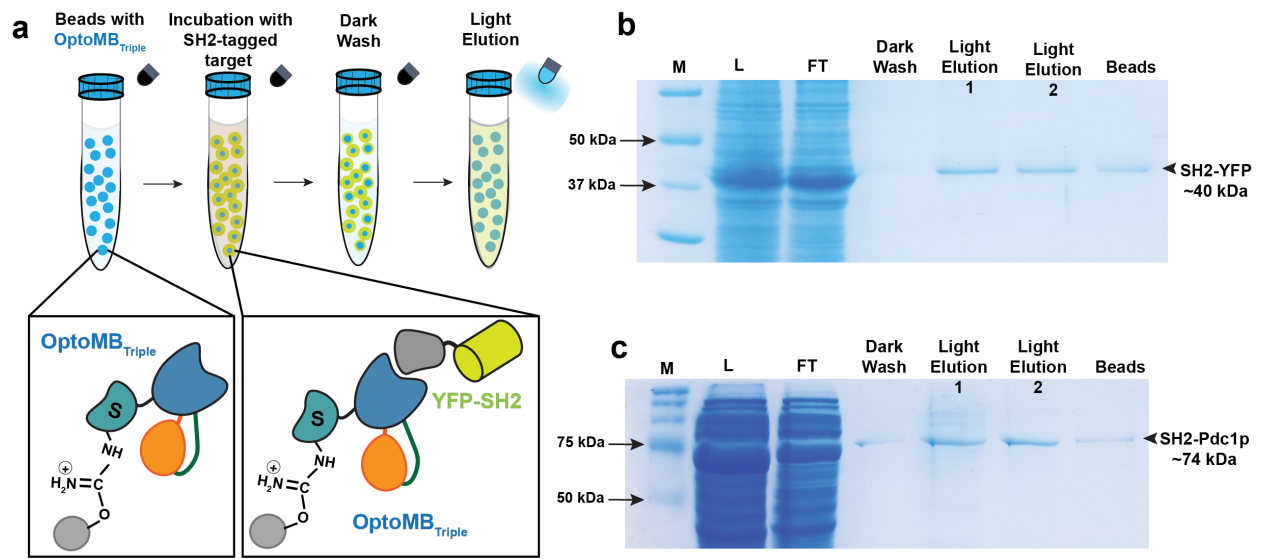

424

425

426

427

428

429

430

431

432

433

434

435

436

437

438

**Supplementary Fig. 5: Light-controlled affinity chromatography to purify SH2-tagged**

**proteins using cyanogen bromide (CNBr)-conjugated OptoMB.** **a**, Schematic diagram of

OptoMB<sub>V416L\_G528A\_N538E</sub> with SUMO tag (S) covalently linked to CNBr beads through surface-

exposed primary amines, and their use in LCAC as described before. **b**, **c**, SDS-PAGE gel of

YFP-SH2 (**b**) or SH2-PDC1 (**c**) purified using SUMO-tagged OptoMB<sub>V416L\_G528A\_N538E</sub>

conjugated to CNBr beads, in batch. Molecular weight markers (M), lysate (L), unbound flow

through (FT), washing step in the dark (Dark Wash), two consecutive light elution aliquots

(Light Elution 1 and 2) and heat-treated beads resolved in SDS-PAGE gel (12%

polyacrylamide). Purifications were repeated at least three times observing similar results.



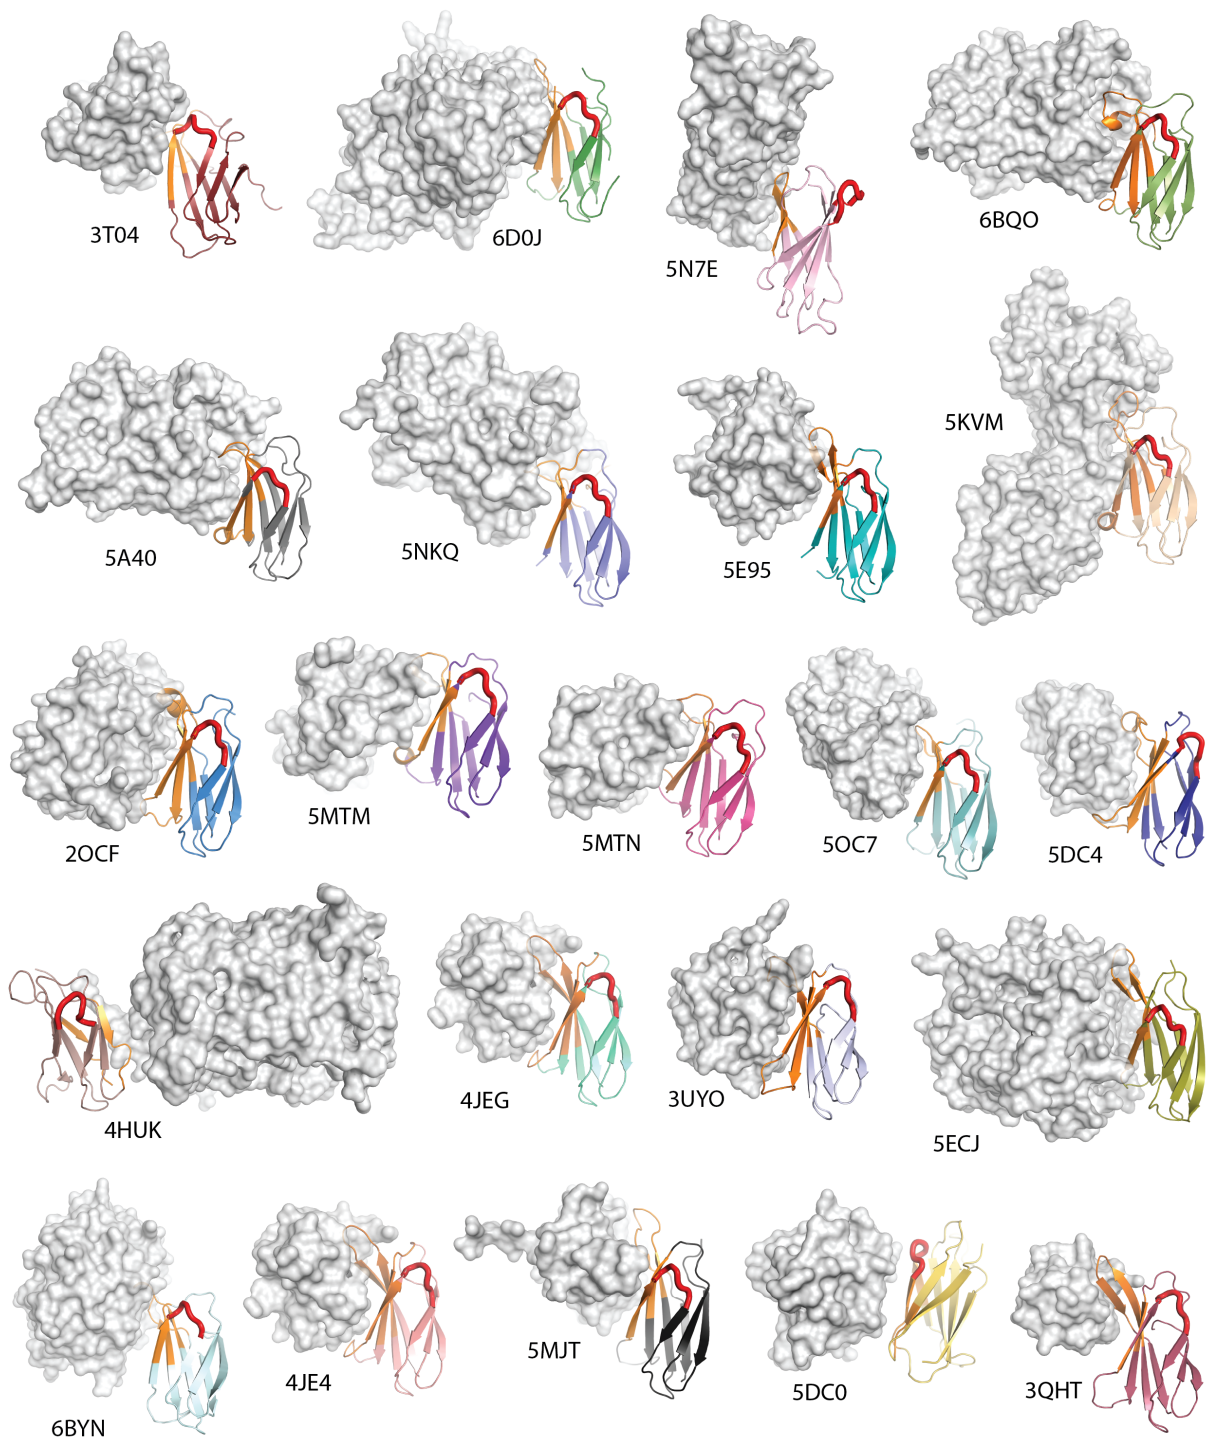

439  
 440 **Supplementary Fig. 6: Structures of the other twenty-two unique monobodies displaying**  
 441 **side-binding modes.** Each monobody is shown (cartoons) in complex with their cognate targets  
 442 (white surfaces) and labeled with their corresponding PDB code. The regions involved in target-  
 443 binding interactions (orange) and the DE loop (red loop) where AsLOV2 is inserted in our  
 444 OptoMB are highlighted.

445 **Supplementary References**

446

- 447 1. Koide, A., Abbatiello, S., Rothgery, L. & Koide, S. Probing protein conformational  
448 changes in living cells by using designer binding proteins: Application to the estrogen  
449 receptor. *Proc. Natl. Acad. Sci. U. S. A.* **99**, 1253–1258 (2002).
- 450 2. Wojcik, J. *et al.* A potent and highly specific FN3 monoclonal antibody inhibitor of the Abl SH2  
451 domain. *Nat. Struct. Mol. Biol.* **17**, 519–527 (2010).
- 452 3. Gilbreth, R. N. *et al.* Isoform-specific monoclonal antibody inhibitors of small ubiquitin-related  
453 modifiers engineered using structure-guided library design. *Proc. Natl. Acad. Sci. U. S. A.*  
454 **108**, 7751–7756 (2011).
- 455 4. Koide, A., Wojcik, J., Gilbreth, R. N., Hoey, R. J. & Koide, S. Teaching an old scaffold  
456 new tricks: Monoclonal antibodies constructed using alternative surfaces of the FN3 scaffold. *J. Mol.*  
457 *Biol.* **415**, 393–405 (2012).
- 458 5. Grebien, F. *et al.* Targeting the SH2-kinase interface in Bcr-Abl inhibits leukemogenesis.  
459 *Cell* **147**, 306–319 (2011).
- 460 6. Lu, M. *et al.* Structures of a Na<sup>+</sup>-coupled, substrate-bound MATE multidrug transporter.  
461 *Proc. Natl. Acad. Sci. U. S. A.* **110**, 2099–2104 (2013).
- 462 7. Sha, F. *et al.* Dissection of the BCR-ABL signaling network using highly specific  
463 monoclonal antibody inhibitors to the SHP2 SH2 domains. *Proc. Natl. Acad. Sci. U. S. A.* **110**,  
464 14924–14929 (2013).
- 465 8. Stockbridge, R. B., Robertson, J. L., Kolmakova-Partensky, L. & Miller, C. A family of  
466 fluoride-specific ion channels with dual-topology architecture. *Elife* **2**, 1–14 (2013).
- 467 9. Stockbridge, R. B. *et al.* Crystal structures of a double-barrelled fluoride ion channel.  
468 *Nature* **525**, 548–551 (2015).
- 469 10. Wojcik, J. *et al.* Allosteric inhibition of Bcr-Abl kinase by high affinity monoclonal  
470 antibody inhibitors directed to the Src homology 2 (SH2)-kinase interface. *J. Biol. Chem.* **291**,  
471 8836–8847 (2016).
- 472 11. Spencer-Smith, R. *et al.* Inhibition of RAS function through targeting an allosteric  
473 regulatory site. *Nat. Chem. Biol.* **13**, 62–68 (2017).
- 474 12. Nady, N. *et al.* ETO family protein Mtgr1 mediates Prdm14 functions in stem cell  
475 maintenance and primordial germ cell formation. *Elife* **4**, 1–28 (2015).

- 476 13. Zorba, A. *et al.* Allosteric modulation of a human protein kinase with monobodies. *Proc.*  
477 *Natl. Acad. Sci. U. S. A.* **116**, 13937–13942 (2019).
- 478 14. Last, N. B., Kolmakova-Partensky, L., Shane, T. & Miller, C. Mechanistic signs of  
479 double-barreled structure in a fluoride ion channel. *Elife* **5**, 1–10 (2016).
- 480 15. Salzman, G. S. *et al.* Structural Basis for Regulation of GPR56/ADGRG1 by Its  
481 Alternatively Spliced Extracellular Domains. *Neuron* **91**, 1292–1304 (2016).
- 482 16. Kükenshöner, T. *et al.* Selective Targeting of SH2 Domain–Phosphotyrosine Interactions  
483 of Src Family Tyrosine Kinases with Monobodies. *J. Mol. Biol.* **429**, 1364–1380 (2017).
- 484 17. Reckel, S. *et al.* Structural and functional dissection of the DH and PH domains of  
485 oncogenic Bcr-Abl tyrosine kinase. *Nat. Commun.* **8**, (2017).
- 486 18. Diver, M. M., Pedi, L., Koide, A., Koide, S. & Long, S. B. Atomic structure of the  
487 eukaryotic intramembrane RAS methyltransferase ICMT. *Nature* **553**, 526–529 (2018).
- 488 19. Gumpena, R. *et al.* Crystal structure of the human dual specificity phosphatase 1 catalytic  
489 domain. *Protein Sci.* **27**, 561–567 (2018).
- 490 20. McIlwain, B. C., Newstead, S. & Stockbridge, R. B. Cork-in-Bottle Occlusion of Fluoride  
491 Ion Channels by Crystallization Chaperones. *Structure* **26**, 635-639.e1 (2018).
- 492 21. Turman, D. L., Cheloff, A. Z., Corrado, A. D., Nathanson, J. T. & Miller, C. Molecular  
493 Interactions between a Fluoride Ion Channel and Synthetic Protein Blockers. *Biochemistry*  
494 **57**, 1212–1218 (2018).
- 495 22. Gupta, A. *et al.* Facile target validation in an animal model with intracellularly expressed  
496 monobodies. *Nat. Chem. Biol.* **14**, 895–900 (2018).
- 497 23. Last, N. B. *et al.* A CLC-type F<sup>-</sup>/H<sup>+</sup> antiporter in ion-swapped conformations. *Nat. Struct.*  
498 *Mol. Biol.* **25**, 601–606 (2018).
- 499
